# Supplementary material for: Constitutive glycogen synthase kinase-3α/β activity protects against chronic β-adrenergic remodelling of the heart
Source: PubMed Central journal article supplement — Cardiovasc Res. 2010 Mar 17;87(3):494–503. doi: 10.1093/cvr/cvq061 (PMC2904659; doi:10.1093/cvr/cvq061), 2010-03-17
Supplement: supp_cvq061_cvq061supp.pdf [file supp_cvq061_cvq061supp.pdf]

## Supplementary Methods and Results

### Immunoblotting

Hearts were rapidly excised and snap-frozen in liquid nitrogen. Samples were homogenized in protein extraction buffer (50 mmol/L Tris-HCl; pH 7.5, 1 mmol/L EDTA, 1 mmol/L EGTA, 1% (w/v) Triton X-100, 0.1 %  $\beta$ -mercaptoethanol, 1 mmol/L sodium orthovanadate, 50 mmol/L sodium fluoride, 5 mmol/L sodium pyrophosphate and protease inhibitor tablets (Complete®, Rosh Applied Science), 1 Tab/50 ml of buffer. One millilitre of extraction buffer was used per 100 mg of frozen tissue. The homogenates were centrifuged at 4 °C for 10 min at 13,000 g to remove insoluble fraction and the supernatant was used for electrophoresis. Protein content was estimated using a Bio-Rad Protein Assay Kit. Twenty micrograms of protein were electrophoresed on a 10 % polyacrylamide gel and then blotted onto a polyvinylidene difluoride membrane. After blocking with 5 % non-fat milk, membranes were incubated with primary antibodies and then appropriate secondary antibodies. Primary antibodies used were against phospho-GSK-3 $\alpha/\beta$  (Ser21/9) (#9331), total-Akt (#9272), phospho-Akt (Ser473) (#9271) (all from Cell Signalling), total-GSK-3 $\alpha/\beta$  (#05-903) (Upstate), total-glycogen synthase (#MAB3106) (Chemicon) and phospho-glycogen synthase (Ser 641 and 645) (#44-1092G) (BIOSOURCE) at dilutions of 1:1000. Proteins were visualized using an ECL kit (Amersham).

### Real-time RT-PCR

The following primers were used (5'-3'):

$\beta$ -actin forward CGTGAAAAGATGACCCAGATCA, reverse TGGTACGACCAGAGGCAT-ACAG; ANF forward ATTGGAGCCCAGAGTGGACTA, reverse CCTTTTCCTCCTTGGC-TGTTATC;  $\alpha$ -skeletal actin forward TGACCACAGCTGAACGTGAGAT, reverse CAGGGA-GGAGGAAGAGGCAG; pro-collagen I $\alpha$ I forward CCTCAGGGTATTGCTGGACAAC,

reverse TTGATCCAGAAGGACCTTGTTTG; pro-collagen III $\alpha$ I forward AGGAGCCAGTG-GCCATAATG, reverse TGACCATCTGATCCAGGGTTTC; fibronectin forward CCGGTG-GC TGTCAGTCAGA, reverse CCGTTCCCCTGCTGATTTATC;

### **Invasive Pressure-volume analysis**

*In vivo* measurements were performed using a 1.4F micromanometer-tipped pressure-volume catheter (SPR-839, Millar Instruments) inserted into the cavity of the left ventricle. Mice were anesthetized at day 14 post-pump insertion with 2% isoflurane/oxygen inhalation and ventilated by tracheal intubation. The apex of the left ventricle was exposed via a trans-diaphragmatic approach and cannulated. Pressure-volume (PV) loops were acquired, as previously described.<sup>1, 2</sup> Pre-load pressure-volume relationship was determined by transient occlusion of the inferior vena cava.

### **Cardiac cine-MRI**

Imaging was performed on a 3T Philips Achieva MR scanner using a dedicated cardiac software package (R2.5.3) and clinical gradient system (30mT/m, 200mT/m/ms). Mice were anesthetized and maintained under inhalational anesthesia via nose-cone (2% Isoflurane/oxygen). Rectal temperature was monitored and body temperature maintained at 37°C by warm air flow (using an adapted MRI-compatible heater system, SA Instruments Inc., Stony Brook, NY). Cine MRI was performed with prospective ECG triggering and respiratory gating using a spoiled gradient echo technique. For localization of the heart, a low-resolution gradient echo scout scan was performed in the coronal and transverse orientation. High-resolution (0.2 x 0.2 x 1mm) short axis, two and four chamber (biplane) views were then acquired using the following imaging parameters: FOV = 35mm, matrix = 160, slice thickness = 1mm, TR/TE = 11/5.3ms, flip angle = 20°, 1 line / RR interval, temporal resolution = 11ms, NSA = 2. Segment v1.702 software (<http://segment.heiberg.se>) was used for off-line analysis;

manual endocardial and epicardial mapping was performed for each 1mm slice at end-diastole and end-systole, from which ventricular volumes, ejection fraction and ventricular mass were determined. Ventricular wall thickness was measured at the mid papillary level in end-diastole and end-systole.

#### Reference List

- (1) Burkhoff D, Mirsky I, Suga H. Assessment of systolic and diastolic ventricular properties via pressure-volume analysis: a guide for clinical, translational, and basic researchers. *Am J Physiol Heart Circ Physiol* (2005) **289**(2):H501-H512.
- (2) Tam CW, Husmann K, Clark NC, Clark JE, Lazar Z, Ittner LM *et al.* Enhanced vascular responses to adrenomedullin in mice overexpressing receptor-activity-modifying protein 2. *Circ Res* (2006) **98**(2):262-270.

**Supplement Table 1 Haemodynamic parameters in isolated Langendorff-perfused hearts of WT and KI mice subjected to acute isoproterenol perfusion.** Peak (max), trough (min) and logEC<sub>50</sub> values are given for heart rate (HR), left ventricular developed pressure (LVDP) and contractile performance (dP/dt). Mean values  $\pm$  SEM, n= n=6/group, ns between groups in all categories.

|           | HR (bpm)     |              |                     | LVDP (mmHg)    |                  |                     | dP/dt (mmHg/s) |                |                     |
|-----------|--------------|--------------|---------------------|----------------|------------------|---------------------|----------------|----------------|---------------------|
|           | Min          | Max          | LogEC <sub>50</sub> | Min            | Max              | LogEC <sub>50</sub> | Min            | Max            | LogEC <sub>50</sub> |
| <b>WT</b> | 387 $\pm$ 32 | 595 $\pm$ 13 | -7.7 $\pm$ 0.7      | 68.1 $\pm$ 4.5 | 110.5 $\pm$ 12.3 | -7.7 $\pm$ 0.7      | 2905 $\pm$ 400 | 7909 $\pm$ 714 | -7.7 $\pm$ 0.7      |
| <b>KI</b> | 455 $\pm$ 33 | 552 $\pm$ 23 | -7.7 $\pm$ 1.0      | 68.4 $\pm$ 3.5 | 104.3 $\pm$ 8.7  | -7.7 $\pm$ 0.7      | 2923 $\pm$ 309 | 7363 $\pm$ 915 | -7.7 $\pm$ 0.7      |

**Supplement Table 2: Cardiac MRI.** Structural and functional changes with chronic ISO/vehicle control at 2 weeks (Day 14) and in parallel experiments at a further 2 weeks following pump removal (Day 28). Respiratory- and ECG-gated images were acquired under isoflurane anesthesia. LVVI=left ventricular volume index, LVMI=left ventricular mass index, EDVI=end diastolic volume index, ESVI=end systolic volume index, SVI=stroke volume index, HR=heart rate, CI=cardiac index, EF=ejection fraction, LVd/s= mean left ventricular wall thickness diastole/systole, SWT=systolic wall thickening. n=6/group, \* $p < 0.05$  vs CON within genotype; † $p < 0.05$  vs genotype at each time point.

|                      | GSK-3 WT                   |             | GSK-3 KI   |             | GSK-3 WT                  |             | GSK-3 KI  |            |
|----------------------|----------------------------|-------------|------------|-------------|---------------------------|-------------|-----------|------------|
|                      | 2 weeks Treatment (Day 14) |             |            |             | 2 weeks Recovery (Day 28) |             |           |            |
|                      | CON                        | ISO         | CON        | ISO         | CON                       | ISO         | CON       | ISO        |
| <b>LVVI (ml/g)</b>   | 2.8 ± 0.1                  | 3.5 ± 0.2*  | 2.7 ± 0.1  | 3.1 ± 0.1   | 2.7 ± 0.1                 | 2.9 ± 0.2   | 2.8 ± 0.3 | 3.1 ± 0.4  |
| <b>LVMI (mg/g)</b>   | 2.9 ± 0.1                  | 3.6 ± 0.2*  | 2.9 ± 0.1  | 3.2 ± 0.1   | 2.8 ± 0.1                 | 3.0 ± 0.2   | 3.0 ± 0.4 | 3.3 ± 0.4  |
| <b>EDVI (μl/g)</b>   | 1.6 ± 0.1                  | 1.6 ± 0.2   | 1.7 ± 0.1  | 3.1 ± 0.2*† | 1.4 ± 0.04                | 1.3 ± 0.1   | 1.7 ± 0.2 | 1.5 ± 0.3  |
| <b>ESVI (μl/g)</b>   | 0.7 ± 0.1                  | 1.3 ± 0.2*  | 0.8 ± 0.1  | 1.7 ± 0.2*  | 0.6 ± 0.1                 | 0.8 ± 0.1   | 0.8 ± 0.1 | 0.7 ± 0.2  |
| <b>SVI (μl/g)</b>    | 0.9 ± 0.04                 | 0.3 ± 0.1*  | 0.9 ± 0.1  | 1.4 ± 0.1*† | 0.8 ± 0.1                 | 0.5 ± 0.1*  | 0.9 ± 0.1 | 0.8 ± 0.1  |
| <b>HR</b>            | 511 ± 10                   | 514 ± 8     | 517 ± 10   | 529 ± 7     | 516 ± 12                  | 422 ± 8*†   | 508 ± 8   | 506 ± 8    |
| <b>CI (μl/min.g)</b> | 483 ± 21                   | 164 ± 29*   | 458 ± 38   | 713 ± 61*†  | 406 ± 48                  | 213 ± 27*†  | 440 ± 29  | 404 ± 51   |
| <b>EF (%)</b>        | 58 ± 2                     | 20 ± 4*†    | 53 ± 2     | 44 ± 4      | 57 ± 6                    | 39 ± 5      | 53 ± 4    | 51 ± 4     |
| <b>LVd (mm)</b>      | 0.9 ± 0.04                 | 1.2 ± 0.1*† | 0.9 ± 0.04 | 0.9 ± 0.03  | 1.0 ± 0.02                | 1.0 ± 0.04  | 0.9 ± 0.1 | 1.0 ± 0.03 |
| <b>LVs (mm)</b>      | 1.4 ± 0.04                 | 1.4 ± 0.1   | 1.4 ± 0.03 | 1.3 ± 0.1   | 1.5 ± 0.1                 | 1.3 ± 0.04* | 1.3 ± 0.1 | 1.5 ± 0.1  |
| <b>SWT (%)</b>       | 58 ± 5                     | 16 ± 2*     | 53 ± 8     | 44 ± 9      | 53 ± 4                    | 29 ± 4*†    | 54 ± 8    | 53 ± 6     |
